# Supplementary material for: Effects of Fe-doping induced by valence modulation engineering on the nickel hydroxyfluoride cathode of hybrid supercapacitors
Source: Royal Society of Chemistry journal article supplement (doi:10.1039/d4qi01393j), 2024-01-01
Supplement: d4qi01393j1.pdf [file d4qi01393j1.pdf]

1 **Effect of Fe-doping induced by valence modulation engineering on**

2 **nickel hydroxylfluoride cathode of hybrid supercapacitors**

3 Yutong Zhao<sup>a</sup>, Zeshuo Meng<sup>a</sup>, Jian Xu<sup>a</sup>, Zhengyan Du<sup>a</sup>, Zeyu Hao<sup>a</sup>, Shulong Wang<sup>a</sup>,

4 Hongwei Tian<sup>a,\*</sup>, Zhiqiang Niu<sup>b</sup>, Dawei Su<sup>c</sup>

5 <sup>a</sup> Key Laboratory of Automobile Materials of MOE, School of Materials Science and

6 Engineering, Jilin University, Changchun, 130012, China

7 E-mail: tianhw@jlu.edu.cn (H. Tian)

8 <sup>b</sup> Key Laboratory of Advanced Energy Materials Chemistry (Ministry of Education),

9 Nankai University, Tianjin, 300071, China

10 <sup>c</sup> Applied Chemistry and Environment Science, School of Science, STEM College,

11 RMIT University, Melbourne VIC 3000, Australia.

12

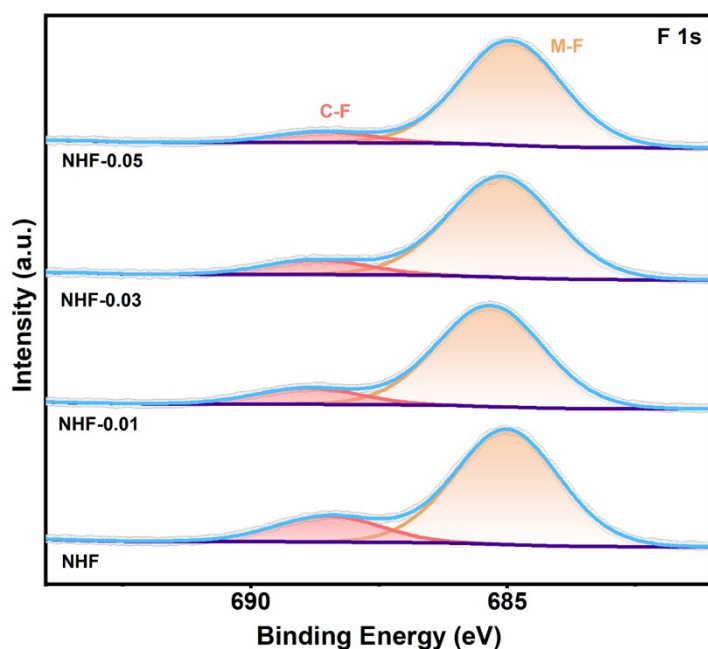

13

14 **Figure S1.F** 1s XPS spectra of NHF-x.

15

16

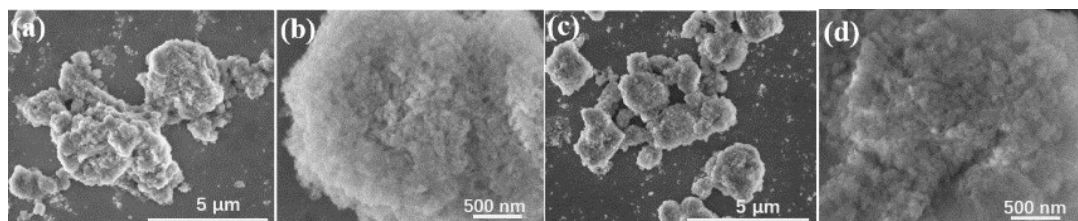

17 **Figure S2.** SEM images of (a), (b) NHF-0.01 and (c), (d) NHF-0.05.

18

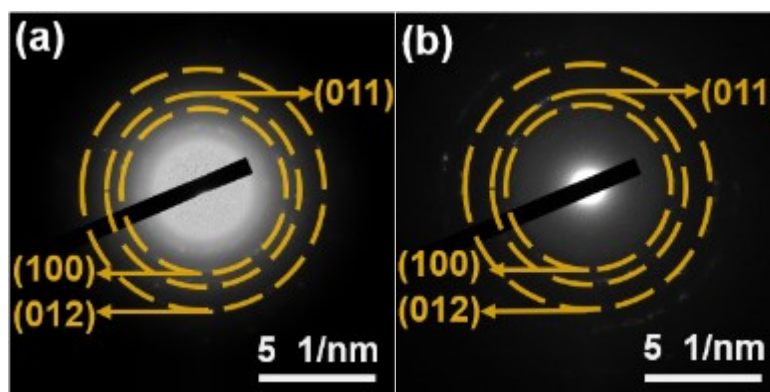

19 **Figure S3.** Selected area electron diffraction (SAED) images of (a) NHF and (b) NHF-

20 0.03.

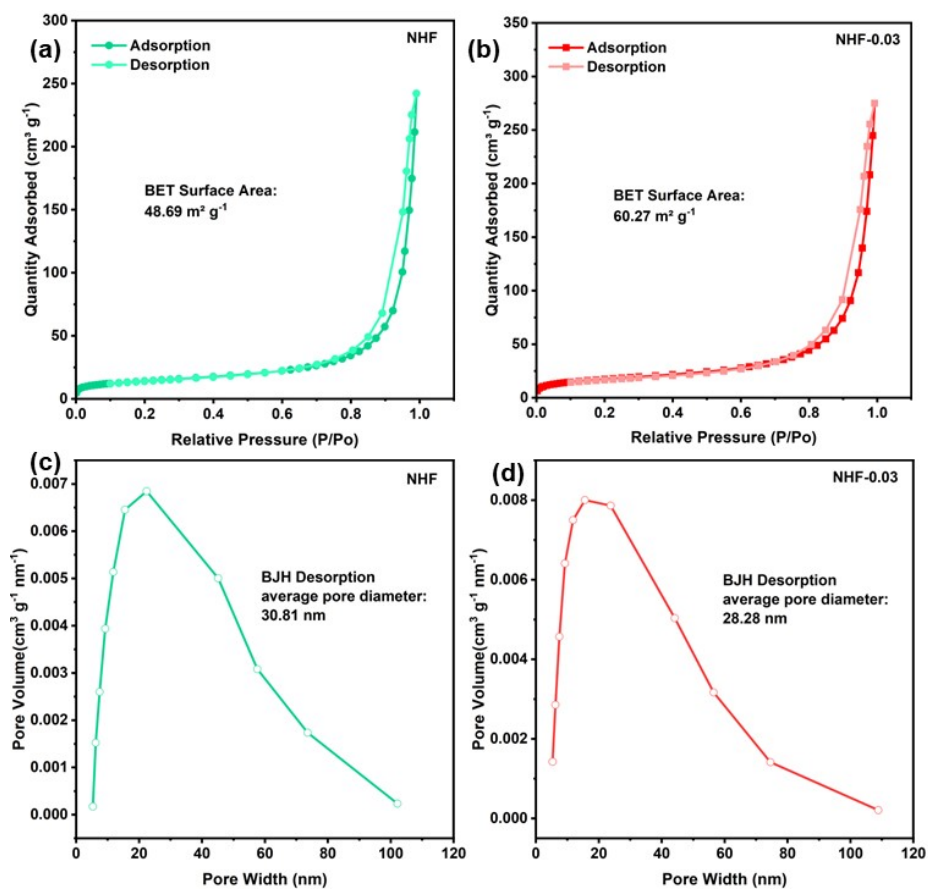

21

22 **Figure S4.** Nitrogen sorption-desorption isotherms of (a) NHF , (b) NHF -0.03. pore

23 size distributions of (c) NHF, (d) NHF -0.03.

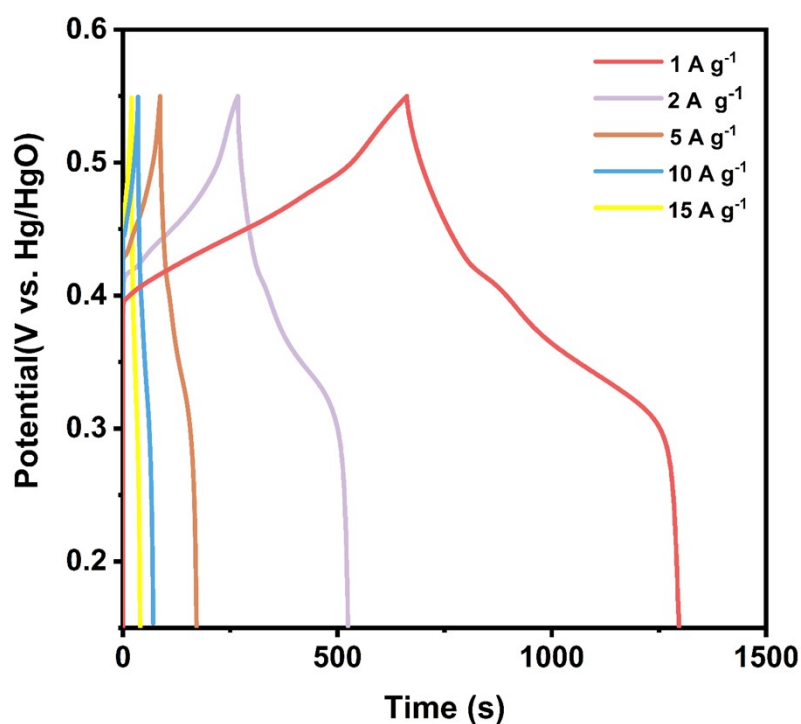

24

25 **Figure S5.** GCD curves of NHF-0.03 at different current densities.

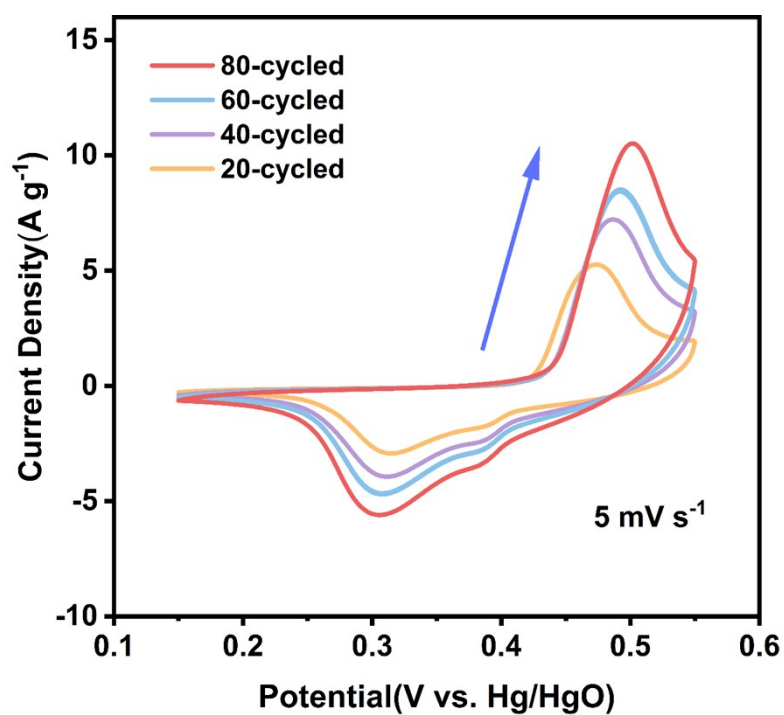

26

27 **Figure S6.** CV cycles of NHF-0.03 of different numbers.

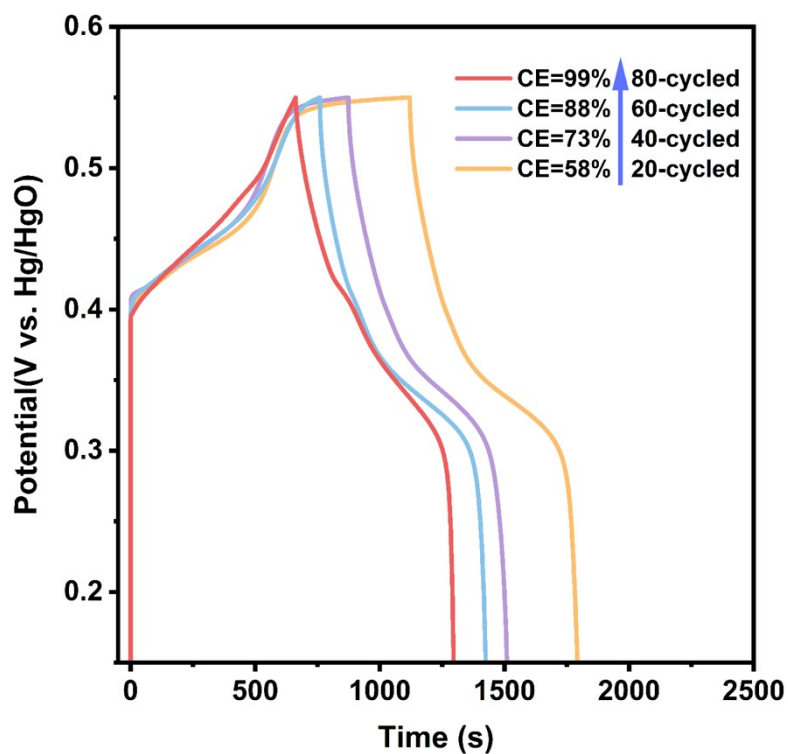

28

29 **Figure S7.** GCD curves of NHF-0.03 of different numbers of CV cycles.

30

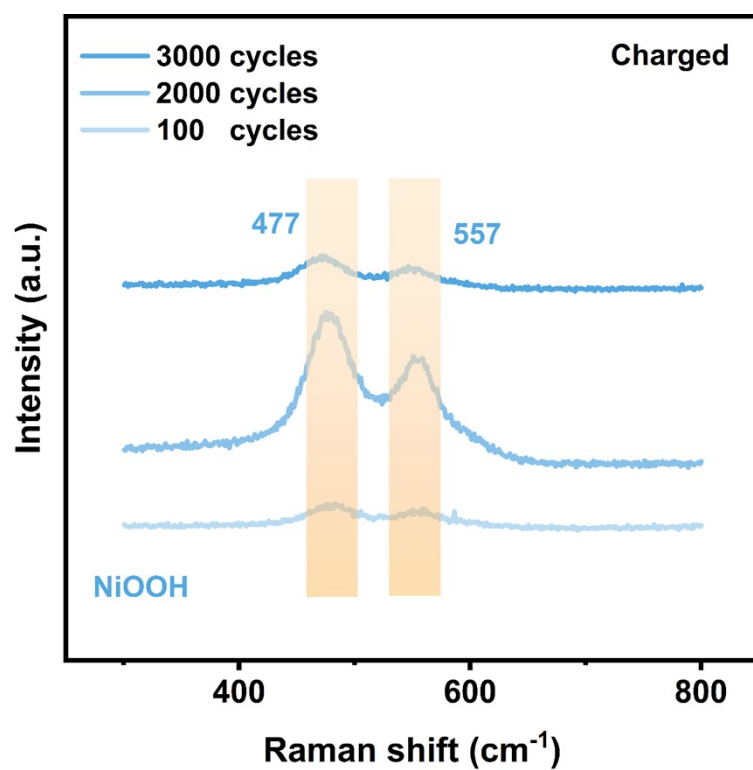

31

32 **Figure S8.** The Raman spectra of NHF-0.03 in the state of charged after different

33 number of cycles.

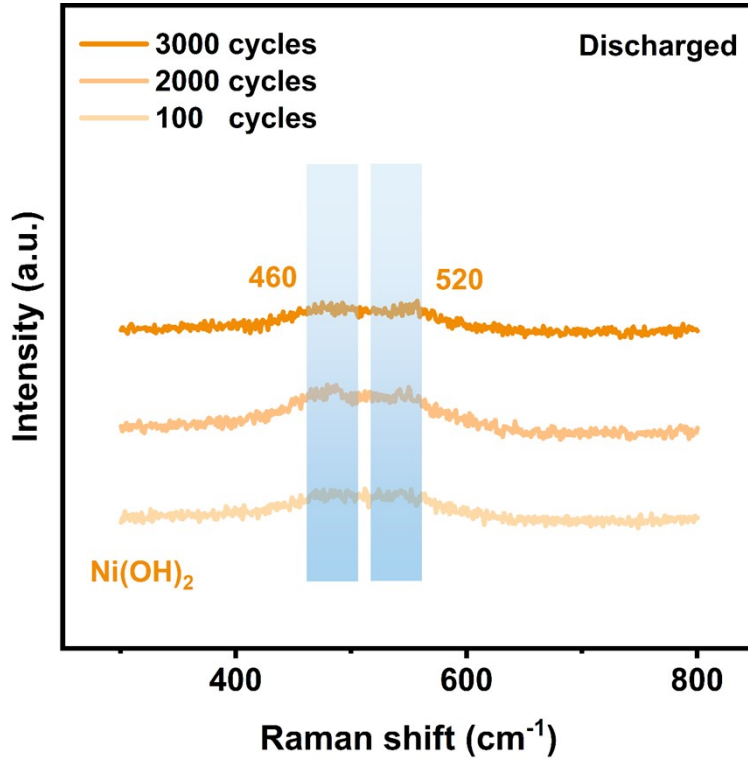

34

35 **Figure S9.** The Raman spectra of NHF-0.03 in the state of discharged after different  
 36 number of cycles.

37 At the beginning of the cycle, the electrode material does not have a complete phase  
 38 transition and is still in the activation stage, so the NiOOH content in the charging state  
 39 is insufficient and the characteristic peaks of the Raman spectra are not obvious<sup>1, 2</sup>.  
 40 Similarly, the characteristic peaks of Raman spectra of Ni(OH)<sub>2</sub> in the discharged state  
 41 are not obvious<sup>3</sup>. During the stabilization phase of the cycle, the phase transition is  
 42 complete and the electrode material can be well transformed between NiOOH and  
 43 Ni(OH)<sub>2</sub> during charging and discharging, and the presence of the two substances can  
 44 be clearly seen in the Raman spectra. After stabilisation, the electrode capacity  
 45 decreases again, which can be attributed to the structural collapse and poorer  
 46 crystallinity of the electrode material after a long cycling process, resulting in poorer  
 47 energy storage performance than in the stabilisation phase<sup>4-7</sup>.

48

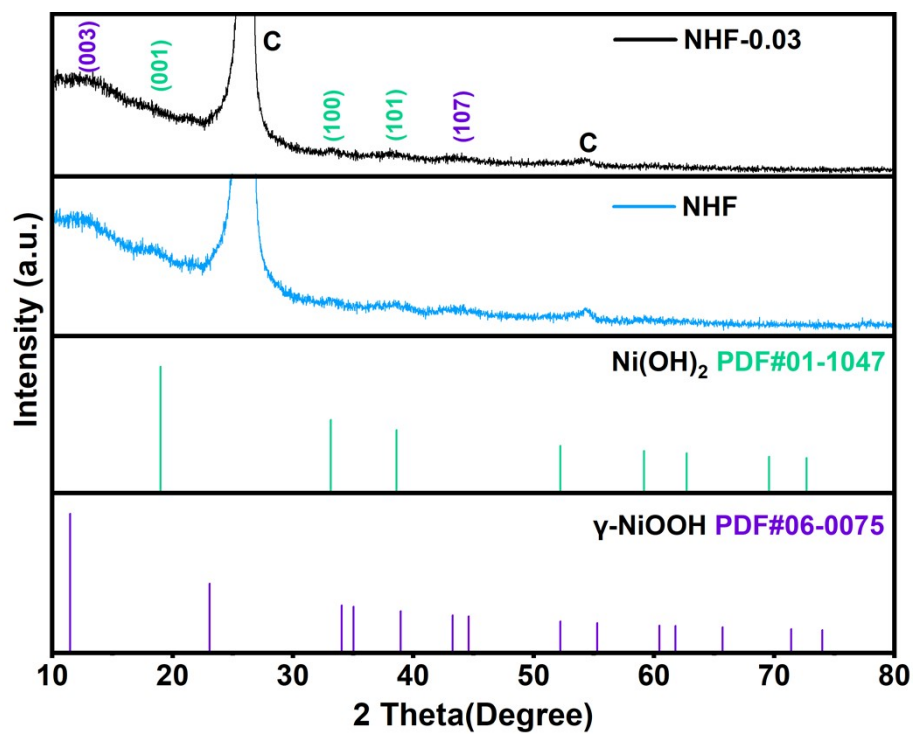

49

50 **Figure S10.**XRD pattern of NHF–x after long-term cycling.

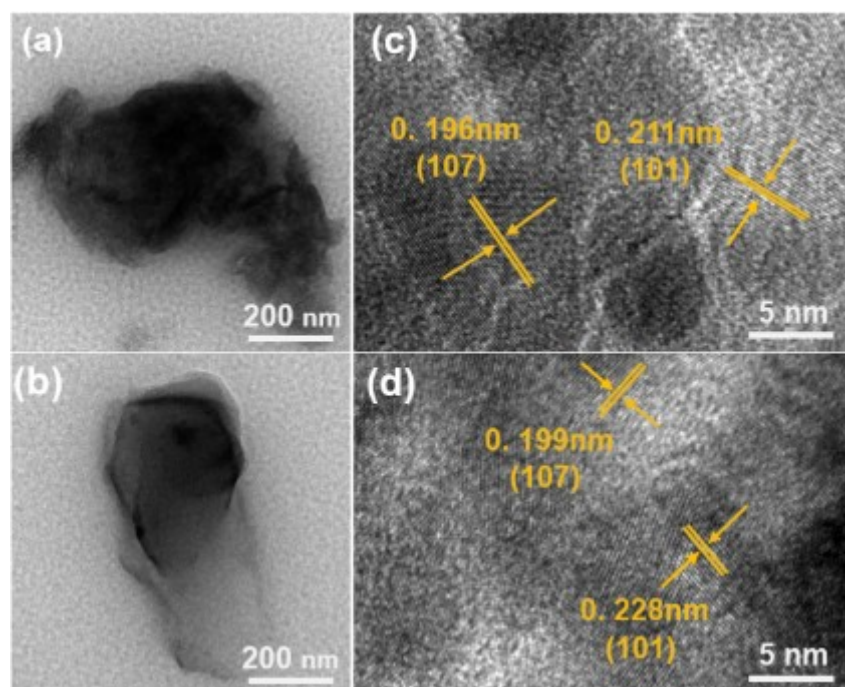

51

52 **Figure S11.**TEM images of (a)NHF, (b) NHF–0.03, and HRTEM images of (c) NHF,

53 (d) NHF–0.03 after long-term cycling.

54

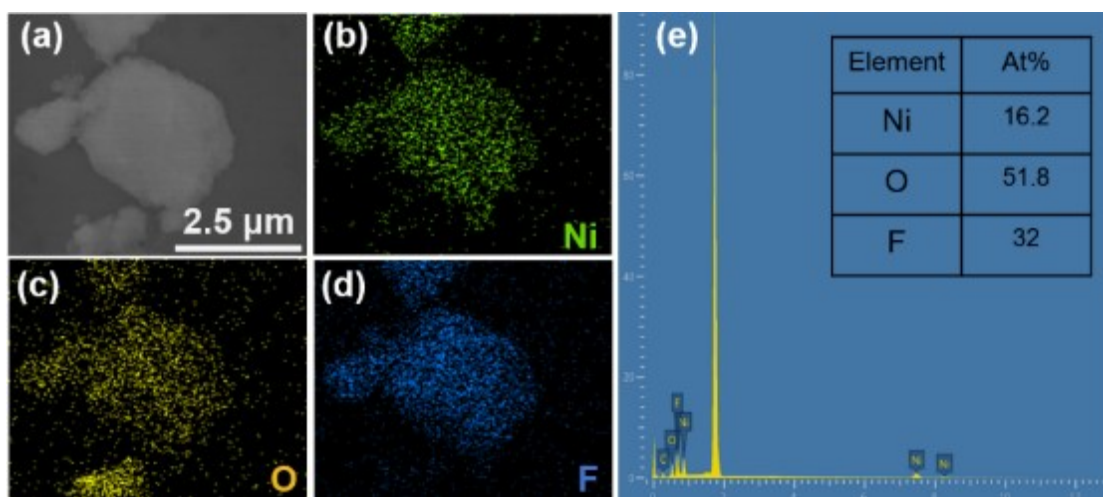

55

56 **Figure S12.** (a) SEM images, and (b-e) Element mapping images of NHF.

57

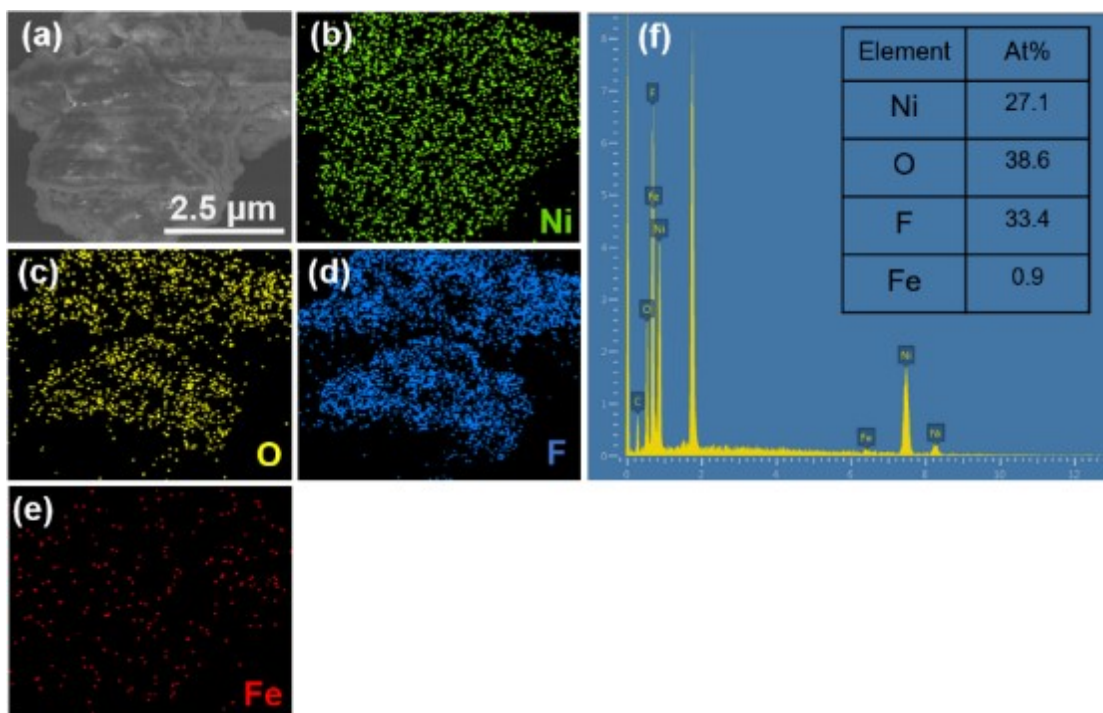

58

59 **Figure S13.** (a) SEM images, and (b-f) Element mapping images of NHF-0.03.

60

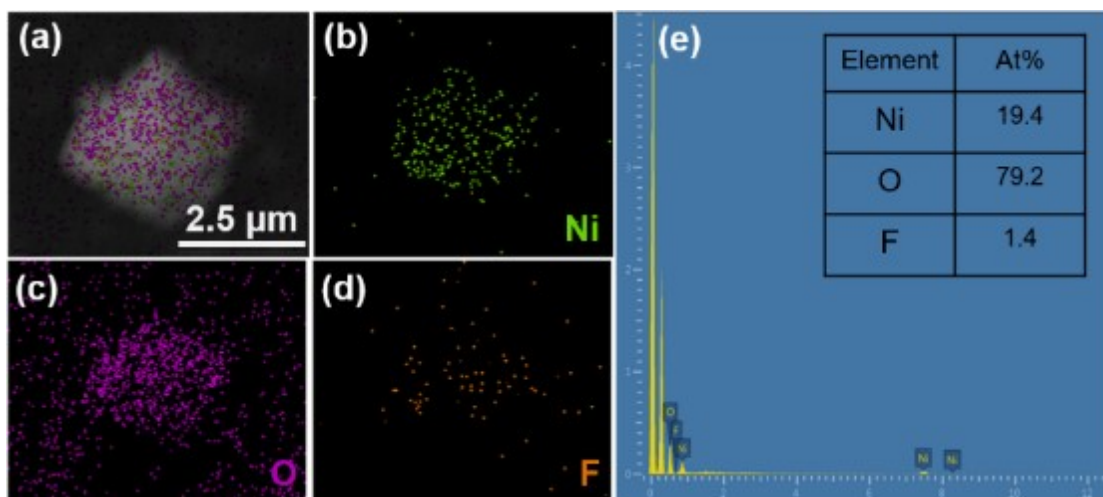

61

62 **Figure S14.** (a) SEM images, and (b-e) Element mapping images of NHF after long-

63 term cycling.

64

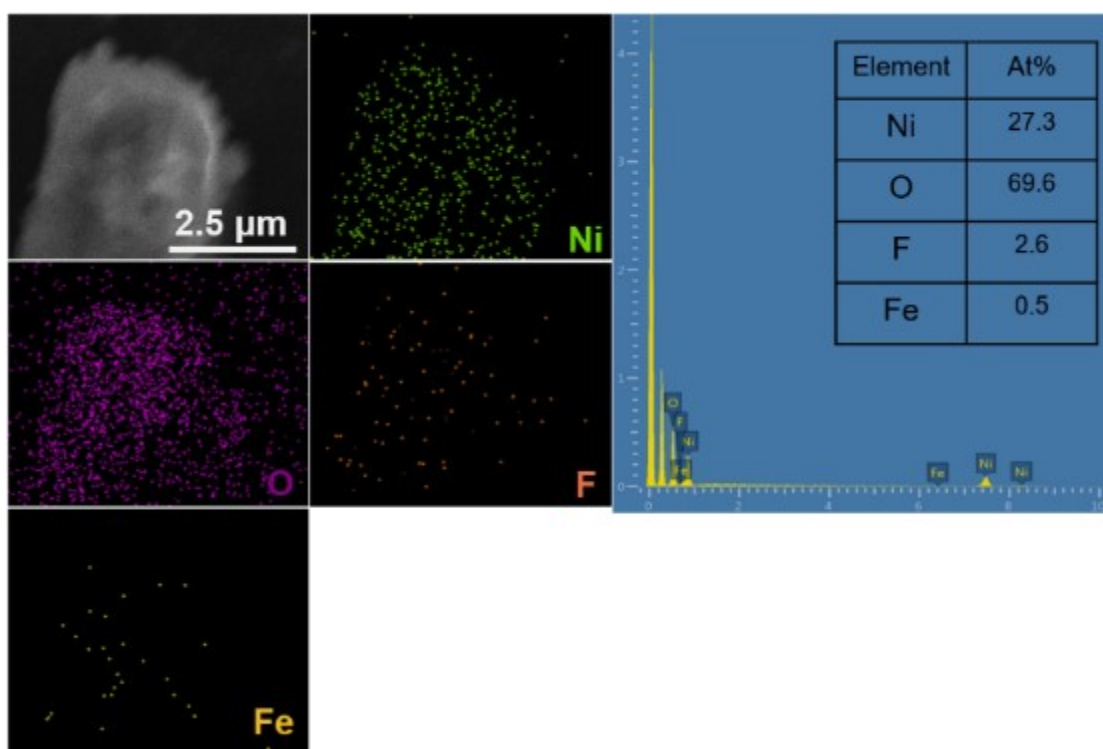

65

66 **Figure S15.** (a) SEM images, and (b-e) Element mapping images of NHF-0.03 after

67 long-term cycling.

68



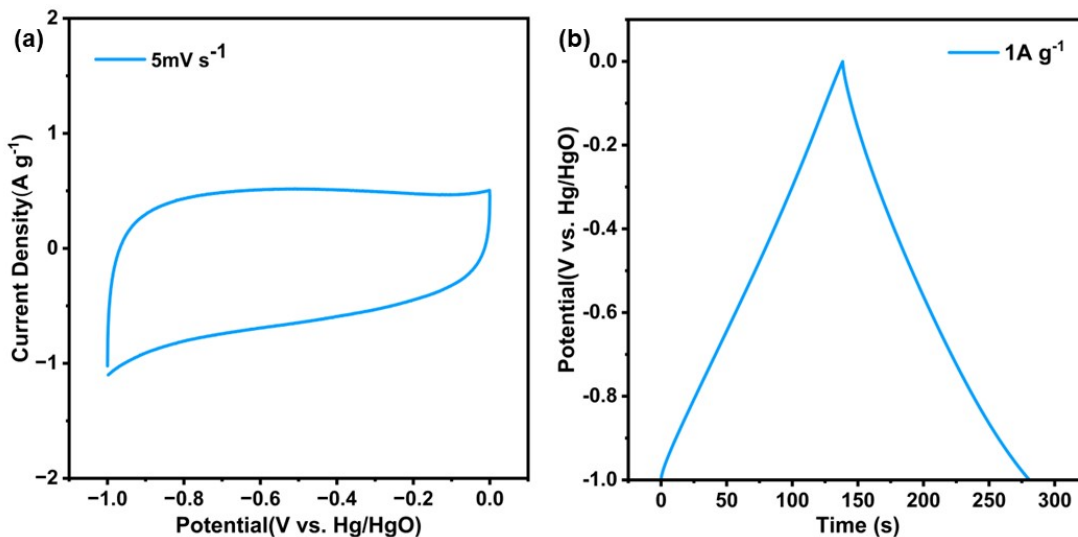

69

70 **Figure S16.** (a) CV curves and (b) GCD curves spectra of AC.

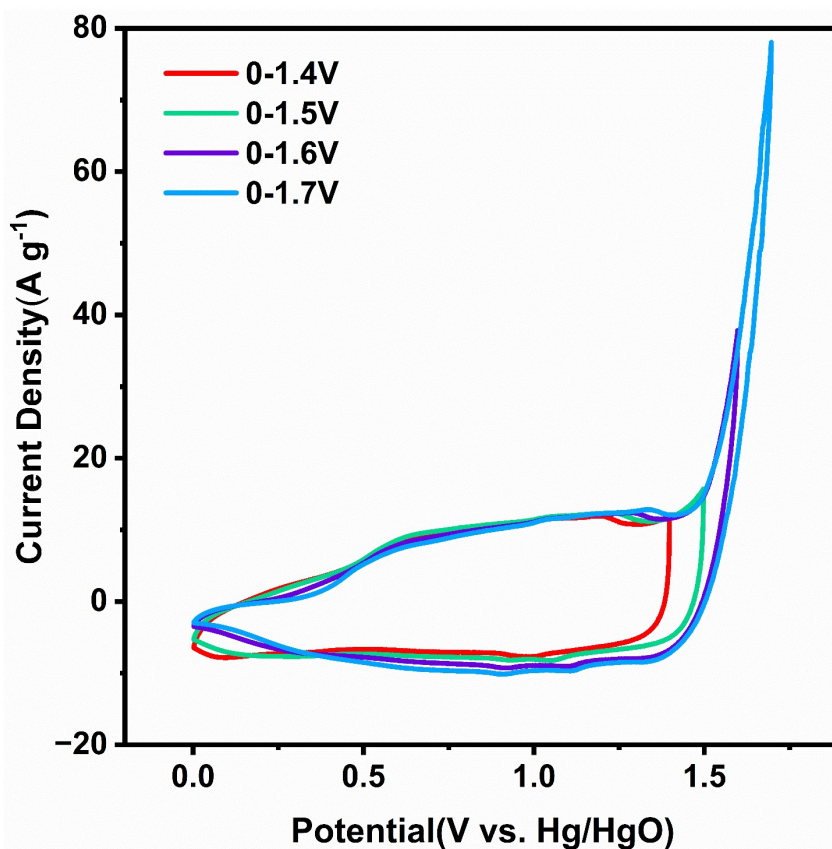

71

72 **Figure S17.** CV plots (at 5 mV s<sup>-1</sup>) of NHF-0.03//AC device at various potential

73 windows.

74

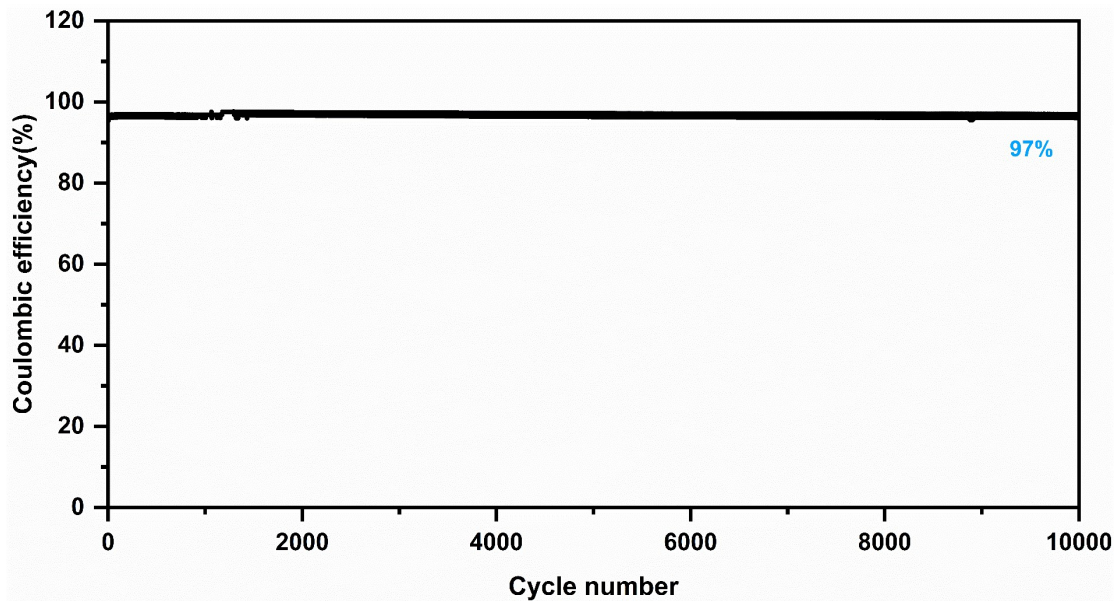

75

76 **Figure S18.** Coulombic efficiency for 10,000 cycles at  $15 \text{ A g}^{-1}$  of the NHF-0.03//AC

77 ASC.

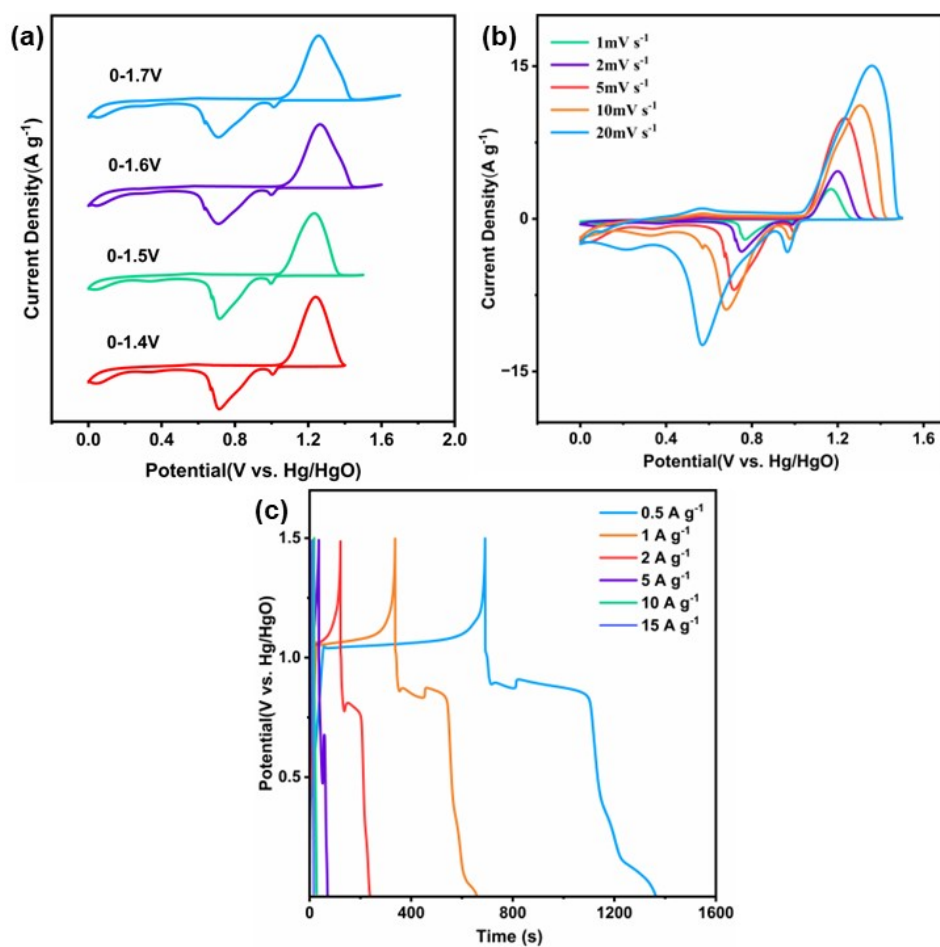

78

79 **Figure S19.** (a) CV curves ( $5 \text{ mV s}^{-1}$ ) at various potential windows, (b) CV plots at 1–

80 20  $\text{mV s}^{-1}$ , and (c) GCD curves at 0.5–15  $\text{A g}^{-1}$  of the designed NHF–0.03// $\text{Bi}_2\text{O}_3$   
81 device.  
82

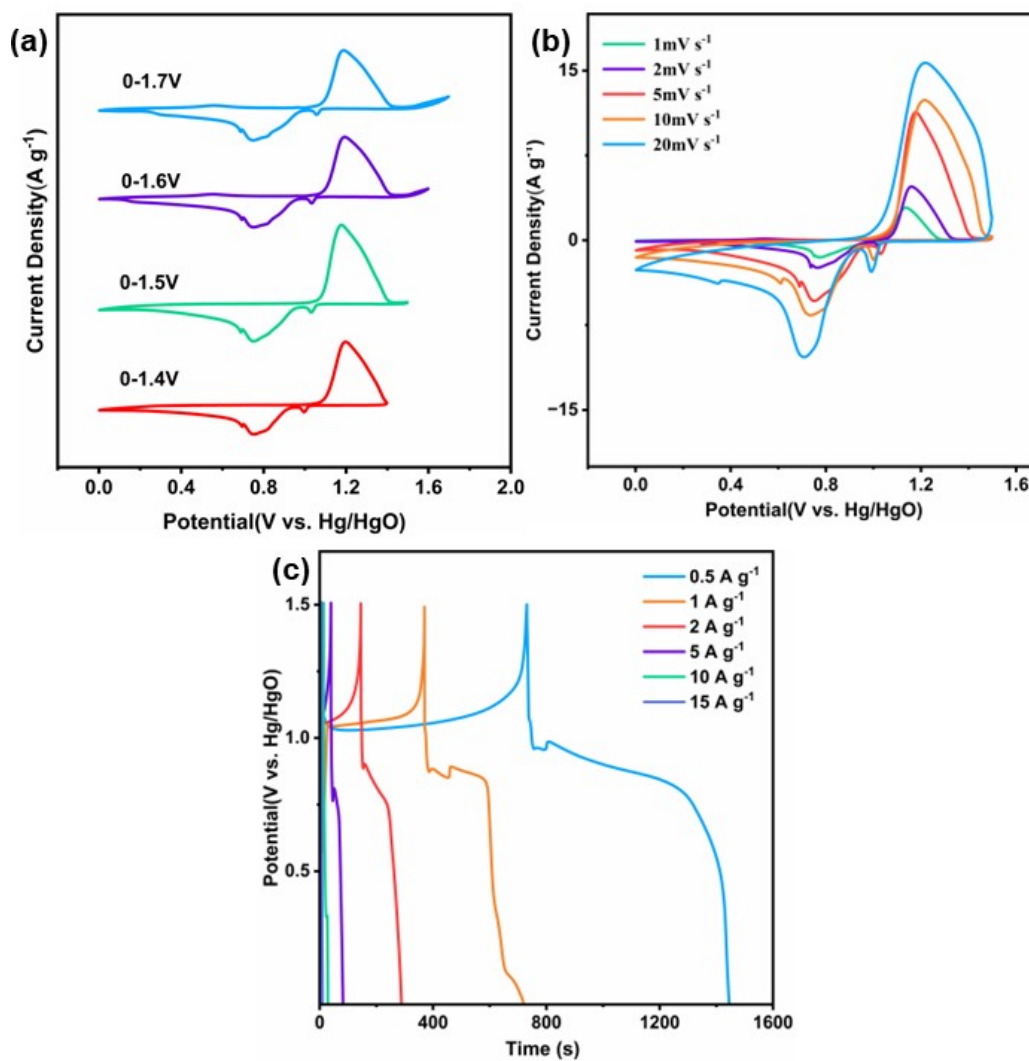

83  
84 **Figure S20.** (a) CV curves ( $5 \text{ mV s}^{-1}$ ) at various potential windows, (b) CV plots at 1–  
85  $20 \text{ mV s}^{-1}$ , and (c) GCD curves at 0.5–15  $\text{A g}^{-1}$  of the designed NHF–0.03//  $\text{Bi}_2\text{O}_3$   
86 device. (Nickel foam is used as current collector).

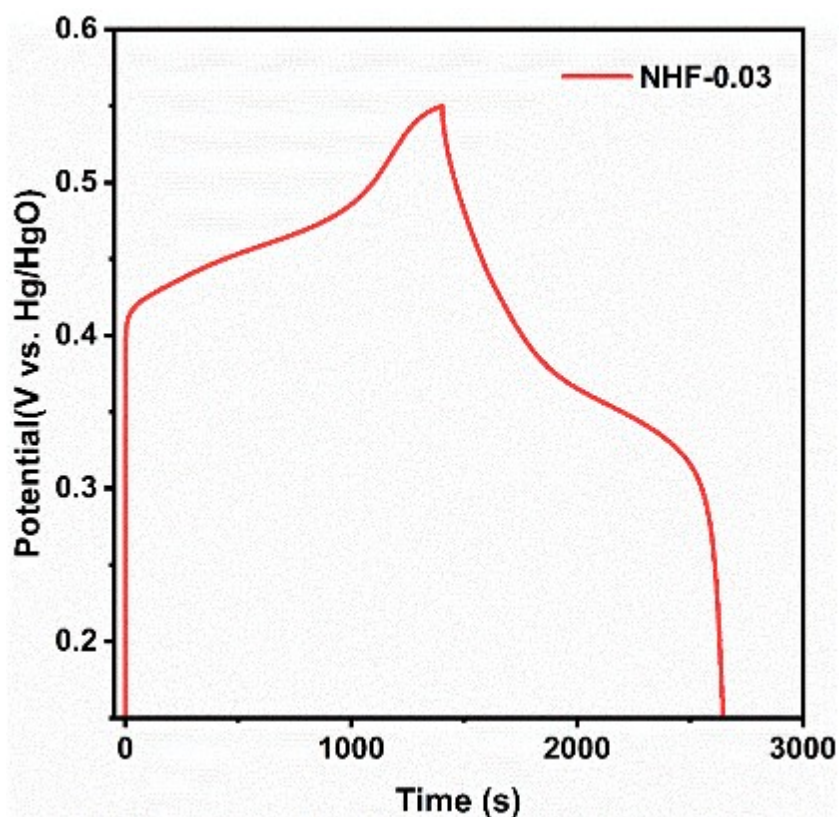

87

88 **Figure S21.** GCD curves spectra at  $1 \text{ A g}^{-1}$  of NHF-0.03 on Ni foam.

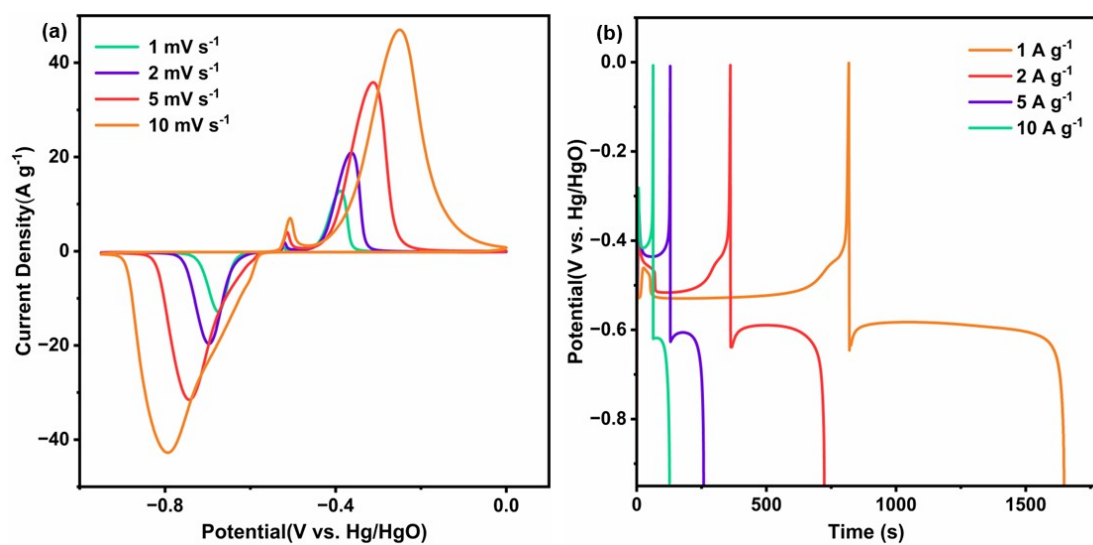

89

90 **Figure S22.** (a) CV plots at  $1\text{-}10 \text{ mV s}^{-1}$  and (b) GCD curves at  $1\text{-}10 \text{ A g}^{-1}$  of  $\text{Bi}_2\text{O}_3$  on

91 Ni foam.

92

93 **Table S1.** Fe/Ni atomic ratios of NHF-x samples by ICP-OES.

|                               |        |        |       |
|-------------------------------|--------|--------|-------|
| Sample x value                | 0.01   | 0.03   | 0.05  |
| Fe/Ni<br>(Raw material ratio) | 0.01   | 0.03   | 0.05  |
| Fe/Ni (by ICP-OES)            | 0.0091 | 0.0180 | 0.232 |

94

95 **Table S2.** Fe<sup>2+</sup>/ Fe<sup>3+</sup> and Ni<sup>2+</sup>/ Ni<sup>3+</sup> ratio of NHF-x (x=0,0.01,0.03,0.05).

|                                     | NHF   | NHF-0.01 | NHF-0.03 | NHF-0.05 |
|-------------------------------------|-------|----------|----------|----------|
| Ni <sup>2+</sup> / Ni <sup>3+</sup> | 1.212 | 1.611    | 1.739    | 1.749    |
| Fe <sup>2+</sup> / Fe <sup>3+</sup> |       | 1.035    | 0.991    | 0.952    |

96

97 **Table S3.** Charge and discharge time of NHF-0.03 of different numbers of CV cycles.

| Cycle numbers<br>time    | 20   | 40  | 60  | 80  |
|--------------------------|------|-----|-----|-----|
| <b>Charge time(s)</b>    | 1158 | 874 | 756 | 642 |
| <b>Discharge time(s)</b> | 673  | 636 | 668 | 633 |

98

99 **Table S4.** EIS impedance spectrum fitting data for prepared electrodes.

| Electrode | Rs(Ω) | Rct(Ω) | Zw(Ω S <sup>-1/2</sup> ) |
|-----------|-------|--------|--------------------------|
| NHF       | 0.98  | 3.31   | 0.31                     |
| NHF-0.01  | 1.07  | 2.22   | 0.27                     |
| NHF-0.03  | 1.12  | 1.35   | 0.25                     |
| NHF-0.05  | 1.10  | 1.91   | 0.35                     |

100

101 **Table S5.** F atomic ratios of NHF and NHF-0.03 before and after long-term cycling.

| At% (F)      | NHF | NHF-0.03 |
|--------------|-----|----------|
| Before cycle | 32  | 33.4     |
| After cycle  | 1.4 | 4.3      |

102

103 **Table S6.** NHF-0.03//AC energy density at different power densities.

|  | 750 W kg <sup>-1</sup>   | 1500 W kg <sup>-1</sup>  | 3000W kg <sup>-1</sup>   | 7500 W kg <sup>-1</sup> | 15000 W kg <sup>-1</sup> | 22500 W kg <sup>-1</sup> |
|--|--------------------------|--------------------------|--------------------------|-------------------------|--------------------------|--------------------------|
|  | 55.5 Wh kg <sup>-1</sup> | 48.6 Wh kg <sup>-1</sup> | 44.9 Wh kg <sup>-1</sup> | 41 Wh kg <sup>-1</sup>  | 33.6 Wh kg <sup>-1</sup> | 25 Wh kg <sup>-1</sup>   |

104

105 **Table S7.** Comparison of energy density and power density of NHF-0.03 //AC ASC

106 with other supercapacitors.

| Supercapacitor                                           | Energy density            | Power density              | Ref.      |
|----------------------------------------------------------|---------------------------|----------------------------|-----------|
| Co-CH@Mn-Ni(OH) <sub>2</sub> / CC//AC                    | 45.8 Wh kg <sup>-1</sup>  | 800.0 W kg <sup>-1</sup>   | 8         |
|                                                          | 25.6 Wh kg <sup>-1</sup>  | 12800.0 W kg <sup>-1</sup> |           |
| Co <sub>3</sub> O <sub>4</sub> @Ni(OH) <sub>2</sub> //AC | 40 Wh kg <sup>-1</sup>    | 346.9 W kg <sup>-1</sup>   | 9         |
|                                                          | 14.4 Wh kg <sup>-1</sup>  | 3455 W kg <sup>-1</sup>    |           |
| Co <sub>0.5</sub> Ni <sub>0.5</sub> WO <sub>4</sub> //AC | 42.2 Wh kg <sup>-1</sup>  | 1047.7 W kg <sup>-1</sup>  | 10        |
|                                                          | 23.7 Wh kg <sup>-1</sup>  | 9371.4 W kg <sup>-1</sup>  |           |
| rP@rGO//Ni <sub>2</sub> P                                | 41.66 Wh kg <sup>-1</sup> | 1200 W kg <sup>-1</sup>    | 11        |
|                                                          | 15.55 Wh kg <sup>-1</sup> | 8000 W kg <sup>-1</sup>    |           |
| Co <sub>0.1</sub> Ni <sub>0.9</sub> P/CNF/ CC//AC/CC     | 32.2 Wh kg <sup>-1</sup>  | 3500 W kg <sup>-1</sup>    | 12        |
|                                                          | 27 Wh kg <sup>-1</sup>    | 14000 W kg <sup>-1</sup>   |           |
| MnO <sub>2</sub> @Co-Ni LDH//AC                          | 40.9 Wh kg <sup>-1</sup>  | 400 W kg <sup>-1</sup>     | 13        |
|                                                          | 21.3 Wh kg <sup>-1</sup>  | 4800 W kg <sup>-1</sup>    |           |
| NHF-0.03//AC                                             | 55.5 Wh kg <sup>-1</sup>  | 750 W kg <sup>-1</sup>     | This Work |
|                                                          | 25 Wh kg <sup>-1</sup>    | 22500 W kg <sup>-1</sup>   |           |

107 **Table S8.** NHF–0.03//Bi<sub>2</sub>O<sub>3</sub> energy density at different power densities.

|  | 750 W kg <sup>-1</sup>    | 1500 W kg <sup>-1</sup>   | 3000W kg <sup>-1</sup>   | 7500 W kg <sup>-1</sup>  | 15000 W kg <sup>-1</sup> | 22500 W kg <sup>-1</sup> |
|--|---------------------------|---------------------------|--------------------------|--------------------------|--------------------------|--------------------------|
|  | 102.3 Wh kg <sup>-1</sup> | 101.1 Wh kg <sup>-1</sup> | 72.8 Wh kg <sup>-1</sup> | 54.2 Wh kg <sup>-1</sup> | 31.3 Wh kg <sup>-1</sup> | 25.0 Wh kg <sup>-1</sup> |

108

109 **Table S9.** NHF–0.03//Bi<sub>2</sub>O<sub>3</sub> energy density at different power densities.( Nickel foam  
110 is used as current collector).

|  | 750 W kg <sup>-1</sup>    | 1500 W kg <sup>-1</sup>   | 3000W kg <sup>-1</sup>   | 7500 W kg <sup>-1</sup>  | 15000 W kg <sup>-1</sup> | 22500 W kg <sup>-1</sup> |
|--|---------------------------|---------------------------|--------------------------|--------------------------|--------------------------|--------------------------|
|  | 112.6 Wh kg <sup>-1</sup> | 110.0 Wh kg <sup>-1</sup> | 89.0 Wh kg <sup>-1</sup> | 66.6 Wh kg <sup>-1</sup> | 47.7 Wh kg <sup>-1</sup> | 28.1Wh kg <sup>-1</sup>  |

111

112

## 113 **References**

- 114 1. S.-K. Geng, Y. Zheng, S.-Q. Li, H. Su, X. Zhao, J. Hu, H.-B. Shu, M. Jaroniec, P. Chen, Q.-H.  
115 Liu and S.-Z. Qiao, Nickel ferrocyanide as a high-performance urea oxidation electrocatalyst,  
116 *Nature Energy*, 2021, **6**, 904-912.
- 117 2. J. Huang, Y. Li, Y. Zhang, G. Rao, C. Wu, Y. Hu, X. Wang, R. Lu, Y. Li and J. Xiong,  
118 Identification of Key Reversible Intermediates in Self-Reconstructed Nickel-Based Hybrid  
119 Electrocatalysts for Oxygen Evolution, *Angewandte Chemie International Edition*, 2019, **58**,  
120 17458-17464.
- 121 3. W. Lai, L. Ge, H. Li, Y. Deng, B. Xu, B. Ouyang and E. Kan, In situ Raman spectroscopic study  
122 towards the growth and excellent HER catalysis of Ni/Ni(OH)<sub>2</sub> heterostructure, *International*  
123 *Journal of Hydrogen Energy*, 2021, **46**, 26861-26872.
- 124 4. S. Li, Y. Zhang, N. Liu, C. Yu, S.-J. Lee, S. Zhou, R. Fu, J. Yang, W. Guo, H. Huang, J.-S. Lee,  
125 C. Wang, T. R. Kim, D. Nordlund, P. Pianetta, X. Du, J. Zhao, Y. Liu and J. Qiu, Operando  
126 Revealing Dynamic Reconstruction of NiCo Carbonate Hydroxide for High-Rate Energy  
127 Storage, *Joule*, 2020, **4**, 673-687.

- 128 5. P. Tang, P. Gao, X. Cui, Z. Chen, Q. Fu, Z. Wang, Y. Mo, H. Liu, C. Xu, J. Liu, J. Yan and S.  
129 Passerini, Covalency Competition Induced Active Octahedral Sites in Spinel Cobaltites for  
130 Enhanced Pseudocapacitive Charge Storage, *Advanced Energy Materials*, 2022, **12**, 2102053.
- 131 6. P. Gao, P. Tang, Y. Mo, P. Xiao, W. Zhou, S. Chen, H. Dong, Z. Li, C. Xu and J. Liu, Covalency  
132 competition induced selective bond breakage and surface reconstruction in manganese cobaltite  
133 towards enhanced electrochemical charge storage, *Green Energy & Environment*, 2024, **9**, 909-  
134 918.
- 135 7. P. Tang, W. Tan, G. Deng, Y. Zhang, S. Xu, Q. Wang, G. Li, J. Zhu, Q. Dou and X. Yan,  
136 Understanding Pseudocapacitance Mechanisms by Synchrotron X-ray Analytical Techniques,  
137 *ENERGY & ENVIRONMENTAL MATERIALS*, 2023, **6**, e12619.
- 138 8. G. Wang, Y. Ding, Z. Xu, G. Wang, Z. Li and Z. Yan,  $\text{Co}_3\text{O}_4@\text{Mn-Ni}(\text{OH})_2$  core-shell  
139 heterostructure for hybrid supercapacitor electrode with high utilization, *Chemical Engineering*  
140 *Journal*, 2023, **469**, 143984.
- 141 9. X. Bai, Q. Liu, J. Liu, H. Zhang, Z. Li, X. Jing, P. Liu, J. Wang and R. Li, Hierarchical  
142  $\text{Co}_3\text{O}_4@\text{Ni}(\text{OH})_2$  core-shell nanosheet arrays for isolated all-solid state supercapacitor  
143 electrodes with superior electrochemical performance, *Chemical Engineering Journal*, 2017,  
144 **315**, 35-45.
- 145 10. B. Huang, H. Wang, S. Liang, H. Qin, Y. Li, Z. Luo, C. Zhao, L. Xie and L. Chen, Two-  
146 dimensional porous cobalt-nickel tungstate thin sheets for high performance supercapattery,  
147 *Energy Storage Materials*, 2020, **32**, 105-114.
- 148 11. N. Parveen, M. Hilal and J. I. Han, Newly Design Porous/Sponge Red Phosphorus@Graphene  
149 and Highly Conductive  $\text{Ni}_2\text{P}$  Electrode for Asymmetric Solid State Supercapacitive Device  
150 With Excellent Performance, *Nano-Micro Letters*, 2020, **12**, 25.
- 151 12. N. Zhang, Y. Li, J. Xu, J. Li, B. Wei, Y. Ding, I. Amorim, R. Thomas, S. M. Thalluri, Y. Liu, G.  
152 Yu and L. Liu, High-Performance Flexible Solid-State Asymmetric Supercapacitors Based on  
153 Bimetallic Transition Metal Phosphide Nanocrystals, *ACS Nano*, 2019, **13**, 10612-10621.
- 154 13. H. Luo, B. Wang, T. Liu, F. Jin, R. Liu, C. Xu, C. Wang, K. Ji, Y. Zhou, D. Wang and S. Dou,  
155 Hierarchical design of hollow Co-Ni LDH nanocages strung by  $\text{MnO}_2$  nanowire with enhanced  
156 pseudocapacitive properties, *Energy Storage Materials*, 2019, **19**, 370-378.
